# Supplementary material for: Primary Care Practitioner Perceptions on the Follow-up of Abnormal Cancer Screening Test Results
Source: PubMed Central journal article supplement (PMC9523497; doi:10.1001/jamanetworkopen.2022.34194), 2022-09-29
Supplement: jamanetwopen-e2234194-s001.pdf [file jamanetwopen-e2234194-s001.pdf]

## Supplemental Online Content

Atlas SJ, Tosteson ANA, Burdick TE, et al. Primary care practitioner perceptions on the follow-up of abnormal cancer screening test results. *JAMA Netw Open*. 2022;5(9):e2234194. doi:10.1001/jamanetworkopen.2022.34194

**eTable 1.** Independent Predictors (Cancer Type, PCP and Practice Characteristics) of Questionnaire Responses Using Multivariable Logistic Regression Models

**eTable 2.** Mechanisms to Alert PCPs, Standard Processes to Remind Patients that They are Overdue, and Barriers to Follow-up of Abnormal Screening Results by Cancer Type

This supplemental material has been provided by the authors to give readers additional information about their work.

**eTable 1.** Independent Predictors (Cancer Type, PCP and Practice Characteristics) of Questionnaire Responses Using Multivariable Logistic Regression Models <sup>a</sup>

| Predictor (reference), aOR (95%CI)                   | Cancer Type (breast) |                  |                  | PCP Age (≤50)    | PCP Sex (Female) | PCP Specialty (Internal Medicine) | # Patients (<50/week) | Site (MGH)                                                    |
|------------------------------------------------------|----------------------|------------------|------------------|------------------|------------------|-----------------------------------|-----------------------|---------------------------------------------------------------|
|                                                      | Cervical             | Colorectal       | Lung             |                  |                  |                                   |                       |                                                               |
| <b>Responsible for notifying patient (%)</b>         |                      |                  |                  |                  |                  |                                   |                       |                                                               |
| PCP                                                  | 2.60 (1.95-3.48)     | NS               | 7.67 (5.48-10.7) | -                | 1.72 (1.15-2.57) | 0.44 (0.20-0.96) <sup>b</sup>     | NS                    | 0.40 (0.21-0.77) <sup>d</sup>                                 |
| Provider performing test                             | 3.80 (2.71-5.33)     | 11.43 (7.7-17.0) | NS               | 0.67 (0.46-0.96) | -                | 4.26 (2.27-8.0) <sup>b</sup>      | -                     | -                                                             |
| Provider interpreting test                           | 0.00 (0.00-0.01)     | 0.05 (0.04-0.08) | 0.03 (0.02-0.05) | -                | 1.58 (1.00-2.51) | -                                 | -                     | -                                                             |
| <b>Responsible for managing result follow-up (%)</b> |                      |                  |                  |                  |                  |                                   |                       |                                                               |
| PCP                                                  | NS                   | 1.36 (1.07-1.73) | 2.67 (2.00-3.56) | -                | -                | 0.44 (0.21-0.92) <sup>b</sup>     | -                     | 0.33 (0.17-0.65) <sup>d</sup>                                 |
| Provider performing test                             | 3.32 (2.50-4.40)     | 3.01 (2.31-3.91) | NS               | -                | -                | 2.88 (1.48-5.62) <sup>b</sup>     | -                     | -                                                             |
| Provider interpreting test                           | 0.01 (0.01-0.04)     | 0.08 (0.05-0.12) | 0.09 (0.06-0.15) | -                | -                | 0.41 (0.17-1.00) <sup>b</sup>     | NS                    | -                                                             |
| <b>Automated report alerts for review to</b>         |                      |                  |                  |                  |                  |                                   |                       |                                                               |
| PCP                                                  | NS                   | 1.13 (1.00-1.28) | NS               | -                | -                | 0.28 (0.09-0.84) <sup>b</sup>     | -                     | -                                                             |
| Other team member                                    | NS                   | NS               | 0.61 (0.48-0.77) | -                | -                | 3.45 (1.62-7.35) <sup>c</sup>     | -                     | 0.31 (0.11-0.85) <sup>d</sup>                                 |
| <b>Standard reminder processes</b>                   |                      |                  |                  |                  |                  |                                   |                       |                                                               |
| Reminder letter sent by mail or patient portal       | 0.80 (0.65-0.98)     | 0.69 (0.58-0.82) | 0.47 (0.37-0.61) | -                | -                | NS                                | NS                    | NS                                                            |
| Automated phone call or text                         | -                    | -                | -                | -                | -                | NS                                | -                     | NS                                                            |
| Population health manager or patient navigator       | NS                   | NS               | 0.60 (0.47-0.76) | -                | -                | -                                 | -                     | 0.45 (0.27-0.76) <sup>e</sup> ; 0.14 (0.04-0.47) <sup>d</sup> |

| Predictor<br>(reference), aOR<br>(95% CI)                           | Cancer Type (breast) |                     |                     | PCP<br>Age<br>(≤50) | PCP Sex<br>(Female) | PCP<br>Specialty<br>(Internal<br>Medicine) | #<br>Patients<br>(<50/<br>week) | Site<br>(MGH)                    |
|---------------------------------------------------------------------|----------------------|---------------------|---------------------|---------------------|---------------------|--------------------------------------------|---------------------------------|----------------------------------|
|                                                                     | Cer-<br>vical        | Colo-<br>rectal     | Lung                |                     |                     |                                            |                                 |                                  |
| <b>Ease of scheduling follow-up for abnormal screens, very easy</b> |                      |                     |                     |                     |                     |                                            |                                 |                                  |
| Repeat mammogram or ultrasound                                      | NA                   | NA                  | NA                  | -                   | NS                  | -                                          | -                               | 0.38<br>(0.18-0.78) <sup>e</sup> |
| Breast biopsy                                                       | NA                   | NA                  | NA                  | -                   | 0.41<br>(0.24-0.70) | -                                          | -                               | 0.37<br>(0.21-0.65) <sup>e</sup> |
| Appointment with breast surgeon                                     | NA                   | NA                  | NA                  | NS                  | 0.39<br>(0.22-0.69) | -                                          | -                               | 0.16<br>(0.09-0.30) <sup>e</sup> |
| Colposcopy                                                          | NA                   | NA                  | NA                  | -                   | -                   | 2.64 (1.15-6.07) <sup>b</sup>              | NS                              | 0.49<br>(0.26-0.93) <sup>e</sup> |
| Appointment with gynecologist                                       | NA                   | NA                  | NA                  | -                   | -                   | 3.07 (1.33-7.06) <sup>b</sup>              | NS                              | NS                               |
| Colonoscopy                                                         | NA                   | NA                  | NA                  | -                   | NS                  | -                                          | -                               | 0.44<br>(0.25-0.76) <sup>e</sup> |
| Chest/ PET CT                                                       | NA                   | NA                  | NA                  | -                   | NS                  | -                                          | -                               | -                                |
| Appointment with lung specialist                                    | NA                   | NA                  | NA                  | -                   | 2.06<br>(1.05-4.03) | -                                          | -                               | -                                |
| <b>Barriers to Follow-up of Abnormal Screens</b>                    |                      |                     |                     |                     |                     |                                            |                                 |                                  |
| Limited EHR tools to facilitate management                          | 1.47<br>(1.25-1.72)  | 1.39<br>(1.18-1.65) | 1.38<br>(1.17-1.63) | -                   | -                   | NS                                         | 0.44<br>(0.25-0.76)             | -                                |
| Limited staff to assist in my practice                              | 1.23<br>(1.07-1.41)  | 1.20<br>(1.02-1.42) | 1.30<br>(1.10-1.54) | 0.48<br>(0.26-0.88) | -                   | -                                          | -                               | NS                               |
| Limited time to discuss                                             | NS                   | NS                  | 1.54<br>(1.23-1.94) | -                   | -                   | -                                          | -                               | -                                |
| Patients have social barriers to receiving care                     | 1.20<br>(1.06-1.36)  | 5.02<br>(3.72-6.78) | 1.24<br>(1.06-1.46) | -                   | -                   | -                                          | -                               | -                                |
| Guidelines/recommendations difficult/complex                        | 2.39<br>(1.23-4.65)  | NS                  | 2.52<br>(1.48-4.31) | -                   | -                   | -                                          | -                               | 2.68<br>(1.19-6.05) <sup>d</sup> |
| Limited availability of specialist                                  | 4.09<br>(1.80-9.30)  | 2.71<br>(1.23-5.96) | 4.44<br>(2.05-9.60) | 0.35<br>(0.16-0.75) | -                   | 0.22 (0.05-0.99) <sup>c</sup>              | -                               | -                                |
| Patients do not understand importance of timely follow-up           | 2.16<br>(1.50-3.11)  | 2.82<br>(1.99-4.00) | 2.13<br>(1.50-3.02) | -                   | -                   | NS                                         | -                               | NS                               |
| Patients have insurance/financial barriers                          | NS                   | 1.53<br>(1.19-1.97) | 1.64<br>(1.25-2.14) | -                   | NS                  | -                                          | NS                              | 3.53<br>(1.56-7.98) <sup>d</sup> |

| Predictor<br>(reference), aOR<br>(95% CI)                                                    | Cancer Type (breast) |                 |      | PCP<br>Age<br>(≤50) | PCP Sex<br>(Female) | PCP<br>Specialty<br>(Internal<br>Medicine) | #<br>Patients<br>(<50/<br>week) | Site<br>(MGH)                    |
|----------------------------------------------------------------------------------------------|----------------------|-----------------|------|---------------------|---------------------|--------------------------------------------|---------------------------------|----------------------------------|
|                                                                                              | Cer-<br>vical        | Colo-<br>rectal | Lung |                     |                     |                                            |                                 |                                  |
| <b>Knowledge of Recommended Timing of Follow-up</b>                                          |                      |                 |      |                     |                     |                                            |                                 |                                  |
| 55 year old woman with a mammogram with a BIRADS 5 result: 3 months                          | NA                   | NA              | NA   | -                   | 0.29<br>(0.14-0.63) | -                                          | -                               | 0.36<br>(0.16-0.83) <sup>e</sup> |
| 55 year old woman with a mammogram with a BIRADS 3 result: 6 months                          | NA                   | NA              | NA   | NS                  | NS                  | -                                          | -                               | -                                |
| 60 year old man with positive FIT/FOBT: 3 months                                             | NA                   | NA              | NA   | NS                  | -                   | NS                                         | -                               | 0.22<br>(0.07-0.65) <sup>e</sup> |
| 65 year old man with 10 or more adenomatous polyps: 1 year                                   | NA                   | NA              | NA   | -                   | -                   | NS                                         | -                               | -                                |
| 70 year old man with a single 1.5cm adenomatous polyp: 3 years                               | NA                   | NA              | NA   | -                   | -                   | -                                          | -                               | 0.54<br>(0.31-0.94) <sup>e</sup> |
| 33 year old woman with HSIL Pap, HPV+ and no history of abnormal screening results: 3 months | NA                   | NA              | NA   | -                   | 0.19<br>(0.10-0.37) | -                                          | -                               | NS                               |
| 23 year old woman whose first Pap shows ASCUS with a negative HPV test: 1 year               | NA                   | NA              | NA   | -                   | -                   | -                                          | -                               | 2.32<br>(1.02-5.26) <sup>d</sup> |
| 60 year old man with a low dose lung CT with an                                              | NA                   | NA              | NA   | NS                  | -                   | NS                                         | -                               | 0.49<br>(0.27-0.89) <sup>e</sup> |

|                                                                                                   |                         |                         |                         |    |    |    |                         |                                      |
|---------------------------------------------------------------------------------------------------|-------------------------|-------------------------|-------------------------|----|----|----|-------------------------|--------------------------------------|
| LRADS 4b<br>result: 3<br>months                                                                   |                         |                         |                         |    |    |    |                         |                                      |
| 60 year old<br>man with a<br>low dose lung<br>CT with an<br>LRADS 3<br>result: 6<br>months        | NA                      | NA                      | NA                      | NS | -  | NS | -                       | 0.39<br>(0.23-<br>0.69) <sup>e</sup> |
| Satisfaction with<br>the Process of<br>Managing<br>Abnormal<br>Screens Results,<br>very satisfied | 0.30<br>(0.22-<br>0.40) | 0.38<br>(0.29-<br>0.51) | 0.32<br>(0.24-<br>0.42) | NS | NS | -  | 1.77<br>(1.09-<br>2.86) | 0.44<br>(0.27-<br>0.74) <sup>e</sup> |

aOR – adjusted odds ratio; PCP – primary care practitioner; MGH – Massachusetts General Hospital; “-” variable did not meet criteria for model entry; NS – Variable entered into model but not statistically significant; NS – cancer type not included in model; PET CT – Positron emission tomography computerized tomography; EHR – electronic health record; BIRADS – Breast Imaging Reporting and Data System; FIT/FOBT – fecal immunochemical test/fecal occult blood test; HSIL – high grade squamous intraepithelial lesion; HPV – human papilloma virus; ASCUS – atypical squamous cells of undetermined significance; CT – computerized tomography; LRADS - Lung Imaging Reporting and Data System

<sup>a</sup> Logistic regression with GEE models including potential predictors significant at 0.15 level in the bivariate analysis presented as adjusted odds (aOR) ratio with 95% confidence intervals (95%CI)

<sup>b</sup> PCP specialty: nurse practitioner/physician assistant

<sup>c</sup> PCP specialty: family medicine provider

<sup>d</sup> Site: Dartmouth Health

<sup>e</sup> Site: Brigham and Women’s Hospital

**eTable 2.** Mechanisms to Alert Primary Care Practitioners, Standard Processes to Remind Patients that They are Overdue, and Barriers to Follow-up of Abnormal Screening Results by Cancer Type

| Mechanisms to Alert PCPs, N (%)                                | Breast cancer | Cervical cancer | Colorectal cancer | Lung cancer |
|----------------------------------------------------------------|---------------|-----------------|-------------------|-------------|
| Automated report alerts for review to <sup>a</sup>             |               |                 |                   |             |
| PCP                                                            | 36 (13.1)     | 40 (14.5)       | 40 (14.5)         | 34 (12.4)   |
| Other team member                                              | 68 (24.7)     | 72 (26.2)       | 66 (24.0)         | 46 (16.7)   |
| Standard reminder processes <sup>b</sup>                       |               |                 |                   |             |
| Reminder letter sent by mail or patient portal                 | 99 (36.0)     | 86 (31.3)       | 78 (28.4)         | 60 (21.8)   |
| Automated phone call or text                                   | 7 (2.5)       | 5 (1.8)         | 5 (1.8)           | 4 (1.5)     |
| Population health manager or patient navigator                 | 92 (33.5)     | 94 (34.2)       | 98 (35.6)         | 65 (23.6)   |
| Barriers to follow-up, <sup>c</sup> responding “major barrier” |               |                 |                   |             |
| Guidelines/recommendations difficult/complex                   | 12 (4.5)      | 28 (10.4)       | 13 (4.9)          | 29 (10.9)   |
| Limited availability of specialist                             | 5 (1.9)       | 19 (7.1)        | 13 (4.9)          | 20 (7.5)    |
| Patients do not understand importance of timely follow-up      | 25 (9.3)      | 47 (17.7)       | 60 (22.4)         | 46 (17.6)   |
| Patients have insurance/financial barriers                     | 29 (10.9)     | 24 (9.0)        | 41 (15.3)         | 43 (16.3)   |

PCP – primary care practitioner

<sup>a</sup> “Does your practice have a mechanism that alerts you or other care team members when a patient is overdue for follow-up of an abnormal result?”

<sup>b</sup> “Does your practice have a standard process to remind patients that they are overdue for follow-up of an abnormal result?”

<sup>c</sup> “In your practice, are the following factors barriers to ensuring the follow-up of an abnormal result for your patients?”
